# Supplementary material for: Nitric oxide production rather than oxidative stress and cell death is associated with the onset of coral bleaching in Pocillopora acuta
Source: PeerJ journal article supplement (doi:10.7717/peerj.13321), 2022-06-01

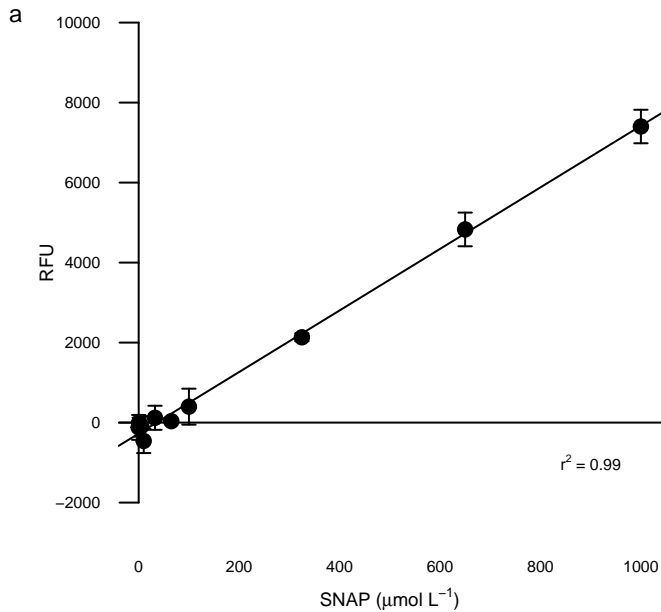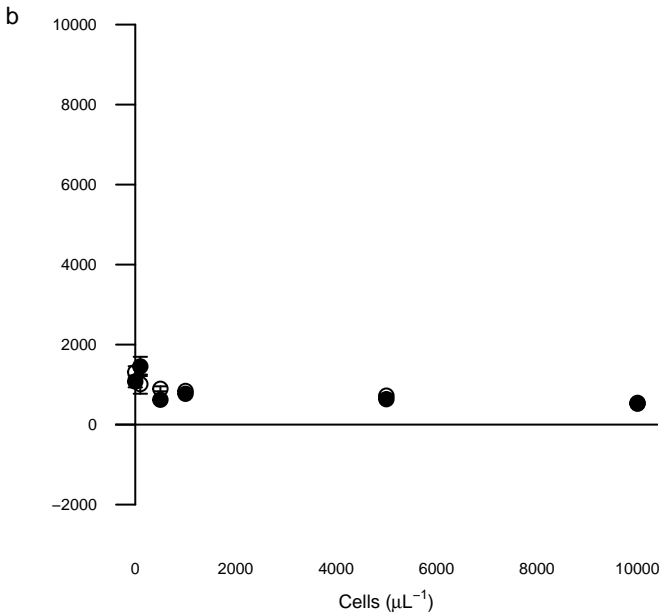

Supplement: Figure_S1.pdf [file Figure_S1.pdf]
