# Supplementary material for: Nitric oxide production rather than oxidative stress and cell death is associated with the onset of coral bleaching in Pocillopora acuta
Source: PeerJ. 2022 Jun 1;10:e13321. doi: 10.7717/peerj.13321 (PMC9166681; doi:10.7717/peerj.13321)
Supplement: Supplemental Information 3 [file peerj-10-13321-s003.xlsx]

## Sheet: Field data
Date	Temp	NOS	NOS.SD	Sytox	Sytox.SD	H2DCF	H2DCF.SD
2006-06-01	26.4043
2006-06-02	26.7	16.4038	8.13534
2006-06-03	27.0042
2006-06-04	27.2708
2006-06-05	27.8708
2006-06-06	28.2125
2006-06-07	28.2087
2006-06-08	28.3583
2006-06-09	28.4375
2006-06-10	28.3833
2006-06-11	27.9625
2006-06-12	27.7542
2006-06-13	27.5773
2006-06-14	27.6
2006-06-15	27.2458
2006-06-16	26.9292
2006-06-17	26.8522	19.5984	4.94625
2006-06-18	26.913
2006-06-19	26.9609
2006-06-20	27.05
2006-06-21	27.0652	6.24796	3.96161
2006-06-22	27.0636
2006-06-23	27.2478	10.2204	0.576081
2006-06-24	27.5957
2006-06-25	27.9478
2006-06-26	27.9571
2006-06-27	28.1043	6.60477	7.42755
2006-06-28	27.6667
2006-06-29	27.4708
2006-06-30	27.2435
2006-07-01	27.0913
2006-07-02	26.875
2006-07-03	26.9
2006-07-04	26.7391
2006-07-05	26.6458	1.01433	1.15742
2006-07-06	26.8045
2006-07-07	26.7739
2006-07-08	26.7375
2006-07-09	26.7208
2006-07-10	26.6652
2006-07-11	26.5583
2006-07-12	26.4583	0.961672	1.60725
2006-07-13	26.5
2006-07-14	26.4292
2006-07-15	26.5
2006-07-16	26.7391
2006-07-17	27.1261
2006-07-18	27.4667
2006-07-19	27.9375
2006-07-20	28.2826
2006-07-21	28.4455
2006-07-22	28.2826
2006-07-23	28.3583
2006-07-24	28.2727
2006-07-25	28.3583
2006-07-26	28.1458
2006-07-27	28.2609
2006-07-28	28.1625
2006-07-29	28.0167
2006-07-30	28.0958
2006-07-31	28.4087
2006-08-01	28.4591
2006-08-02	28.35
2006-08-03	28.1864
2006-08-04	27.8667
2006-08-05	27.5095
2006-08-06	27.2913
2006-08-07	27.2125
2006-08-08	27.15
2006-08-09	27.2591	0.230555	5.48723
2006-08-10	27.3042
2006-08-11	27.2261
2006-08-12	27.1435	2.04623	6.75013
2006-08-13	27.2333
2006-08-14	27.4792
2006-08-15	27.8
2006-08-16	27.8826
2006-08-17	27.925			12.6307	6.08225	32.8272	8.55623
2006-08-18	27.7708
2006-08-19	27.7
2006-08-20	27.6833
2006-08-21	27.7583
2006-08-22	27.6545
2006-08-23	27.6292
2006-08-24	27.8125
2006-08-25	28.4348
2006-08-26	28.4435
2006-08-27	28.5522			34.625	7.0445
2006-08-28	28.9125
2006-08-29	28.9417			25.6943	8.25097	23.9995	5.28557
2006-08-30	28.5917
2006-08-31	28.3
2006-09-01	28.05			27.8012	9.08164	16.8561	5.80327

## Sheet: Zoox.density
Date	Trial	Sample.point.hr	Temp	Zoox.cell/ml
2006-09-16	1	24	28.1	14260714
2006-09-16	1	24	28.1	9116950
2006-09-16	1	24	28.1	5715217
2006-09-16	1	24	28.6	2986900
2006-09-16	1	24	28.6	3247619
2006-09-16	1	24	28.6	4425000
2006-09-16	1	24	29.9	2406250
2006-09-16	1	24	29.9	4950000
2006-09-16	1	24	29.9	2996551
2006-09-16	1	24	28.1	3200000
2006-09-18	1	72	28.1	3818181
2006-09-18	1	72	28.1	2628571
2006-09-18	1	72	28.6	2612903
2006-09-18	1	72	28.6	1940000
2006-09-18	1	72	28.6	8050000
2006-09-18	1	72	29.9	210000
2006-09-18	1	72	29.9	866666
2006-09-18	1	72	29.9	431373
2006-10-11	2	24	28.1	2500000
2006-10-11	2	24	28.1	2.52632e+06
2006-10-11	2	24	28.1	3562500
2006-10-11	2	24	28.6	2800000
2006-10-11	2	24	28.6	3281250
2006-10-11	2	24	28.6	3625000
2006-10-11	2	24	29.9	10018750
2006-10-11	2	24	29.9	1550000
2006-10-11	2	24	29.9	1.52778e+06
2006-10-11	2	24	28.1	3384000
2006-10-13	2	72	28.1	3300000
2006-10-13	2	72	28.1	4.33077e+06
2006-10-13	2	72	28.6	4000000
2006-10-13	2	72	28.6	3.33333e+06
2006-10-13	2	72	28.6	4.92308e+06
2006-10-13	2	72	29.9	5.59091e+06
2006-10-13	2	72	29.9	3.89655e+06
2006-10-13	2	72	29.9	5.44828e+06
2006-11-11	3	24	28.1	1.65657e+06
2006-11-11	3	24	28.1	6200000
2006-11-11	3	24	28.1	4800000
2006-11-11	3	24	28.6	2.26179e+06
2006-11-11	3	24	28.6	6.22222e+06
2006-11-11	3	24	28.6	2.33333e+06
2006-11-11	3	24	29.9	5.41333e+06
2006-11-11	3	24	29.9	2.36667e+06
2006-11-11	3	24	29.9	2.27778e+06
2006-11-11	3	24	28.1	2.33224e+06
2006-11-13	3	72	28.1	5.13935e+06
2006-11-13	3	72	28.1	2.98269e+06
2006-11-13	3	72	28.6	5.99868e+06
2006-11-13	3	72	28.6	3.88974e+06
2006-11-13	3	72	28.6	4.4569e+06
2006-11-13	3	72	29.9	3.49474e+06
2006-11-13	3	72	29.9	3.4871e+06
2006-11-13	3	72	29.9	1.04343e+06

## Sheet: NOS exp
Date	Trial	Hr	Treatment	NOS amol cit/cell/min
2006-09-16	1	24	28.1	1.00379
2006-09-16	1	24	28.6	3.24843
2006-09-16	1	24	29.9	3.3977
2006-11-11	3	24	28.1	0.487434
2006-11-11	3	24	28.6	3.61237
2006-11-11	3	24	29.9	3.57431
2006-09-18	1	72	28.1	4.21622e-06
2006-09-18	1	72	28.6	14.5127
2006-09-18	1	72	29.9	57.6151
2006-10-13	2	72	28.1	6.48919
2006-10-13	2	72	28.6	24.1808
2006-10-13	2	72	29.9	69.8554
2006-11-13	3	72	28.1	1.42943
2006-11-13	3	72	28.6	8.89539
2006-11-13	3	72	29.9	20.019

## Sheet: Staining exp
Date	Trial	Temp	Hr	Sytox.cell.death.proportion	H2DCF.ox.stress.proportion
2006-09-16	1	28.1	24	0.046832	0.0886076
2006-09-16	1	28.1	24	0.0879346	0.115385
2006-09-16	1	28.1	24	0.0920502	0.104478
2006-10-11	2	28.1	24	0.216667	0.175
2006-10-11	2	28.1	24	0.260417	0.118644
2006-10-11	2	28.1	24	0.263158	0.0833333
2006-11-11	3	28.1	24	0.390244	0.127072
2006-11-11	3	28.1	24	0.411111	0.2
2006-11-11	3	28.1	24	0.341667	0.204545
2006-09-16	1	28.6	24	0.316038	0.188406
2006-09-16	1	28.6	24	0.165323	0.212121
2006-09-16	1	28.6	24	0.225989	0.215385
2006-10-11	2	28.6	24	0.508929	0.276923
2006-10-11	2	28.6	24	0.438095	0.336538
2006-10-11	2	28.6	24	0.413793	0.258065
2006-11-11	3	28.6	24	0.368421	0.226891
2006-11-11	3	28.6	24	0.398907	0.242188
2006-11-11	3	28.6	24	0.324675	0.168539
2006-09-16	1	29.9	24	0.171429	0.117188
2006-09-16	1	29.9	24	0.155556	0.103604
2006-09-16	1	29.9	24	0.21519	0.16129
2006-10-11	2	29.9	24	0.313929	0.257282
2006-10-11	2	29.9	24	0.386364	0.193548
2006-10-11	2	29.9	24	0.344086	0.166667
2006-11-11	3	29.9	24	0.418719	0.125561
2006-11-11	3	29.9	24	0.394366	0.135135
2006-11-11	3	29.9	24	0.487805	0.108434
2006-09-18	1	28.1	72	0.484375
2006-09-18	1	28.1	72	0.396825
2006-09-18	1	28.1	72	0.322835
2006-10-13	2	28.1	72	0.370079	0.154762
2006-10-13	2	28.1	72	0.434343	0.0733945
2006-10-13	2	28.1	72	0.47929	0.214286
2006-11-13	3	28.1	72	0.425373	0.152174
2006-11-13	3	28.1	72	0.576159	0.116505
2006-11-13	3	28.1	72	0.474747	0.108696
2006-09-18	1	28.6	72	0.684211
2006-09-18	1	28.6	72	0.641026
2006-09-18	1	28.6	72	0.659091
2006-10-13	2	28.6	72	0.458333	0.0875
2006-10-13	2	28.6	72	0.47	0.213483
2006-10-13	2	28.6	72	0.552083	0.165049
2006-11-13	3	28.6	72	0.487973	0.169231
2006-11-13	3	28.6	72	0.558559	0.140741
2006-11-13	3	28.6	72	0.539394	0.134557
2006-09-18	1	29.9	72	0.709877
2006-09-18	1	29.9	72	0.546392
2006-09-18	1	29.9	72	0.658385
2006-10-13	2	29.9	72	0.471545	0.21374
2006-10-13	2	29.9	72	0.442478	0.137931
2006-10-13	2	29.9	72	0.297468	0.214286
2006-11-13	3	29.9	72	0.58	0.0405405
2006-11-13	3	29.9	72	0.485507	0.154472
2006-11-13	3	29.9	72	0.4	0.166667

## Sheet: Tank temps
Hr	Trial	Treatment	Tank.replicate	Temp
2	1	28.1	A	28.2
3	1	28.1	A	28.6
23	1	28.1	A	27.8
25	1	28.1	A	28
28.5	1	28.1	A	27
47	1	28.1	A	27.8
48.5	1	28.1	A	27.5
70.5	1	28.1	A	27
72	1	28.1	A	27.8
2	1	28.1	B	27.3
3	1	28.1	B	28.4
23	1	28.1	B	28
25	1	28.1	B	27.8
28.5	1	28.1	B	27
47	1	28.1	B	28
48.5	1	28.1	B	27.5
70.5	1	28.1	B	27
72	1	28.1	B	27
2	1	28.1	C	27.9
3	1	28.1	C	28.2
23	1	28.1	C	27.8
25	1	28.1	C	27.8
28.5	1	28.1	C	27
47	1	28.1	C	27
48.5	1	28.1	C	27
70.5	1	28.1	C	27
72	1	28.1	C	27.8
2	1	28.6	A	28.7
3	1	28.6	A	28.9
23	1	28.6	A	28
25	1	28.6	A	28
28.5	1	28.6	A	28
47	1	28.6	A	27
48.5	1	28.6	A	28
70.5	1	28.6	A	27.8
72	1	28.6	A	28
2	1	28.6	B	28.4
3	1	28.6	B	28.4
23	1	28.6	B	28
25	1	28.6	B	28
28.5	1	28.6	B	28
47	1	28.6	B	28
48.5	1	28.6	B	28
70.5	1	28.6	B	28
72	1	28.6	B	28
2	1	28.6	C	28.6
3	1	28.6	C	28.3
23	1	28.6	C	28
25	1	28.6	C	28
28.5	1	28.6	C	27
47	1	28.6	C	27
48.5	1	28.6	C	27
70.5	1	28.6	C	27.8
72	1	28.6	C	27
2	1	29.9	A	30.5
3	1	29.9	A	30.1
23	1	29.9	A	30
25	1	29.9	A	30
28.5	1	29.9	A	29
47	1	29.9	A	30
48.5	1	29.9	A	30
70.5	1	29.9	A	30
72	1	29.9	A	30
2	1	29.9	B	29.3
3	1	29.9	B	29.5
23	1	29.9	B	29
25	1	29.9	B	29
28.5	1	29.9	B	29
47	1	29.9	B	30
48.5	1	29.9	B	30
70.5	1	29.9	B	30
72	1	29.9	B	29.5
2	1	29.9	C	30.2
3	1	29.9	C	30.6
23	1	29.9	C	30
25	1	29.9	C	29.8
28.5	1	29.9	C	29
47	1	29.9	C	30
48.5	1	29.9	C	30
70.5	1	29.9	C	30
72	1	29.9	C	30
0.5	2	28.1	A	27
1.5	2	28.1	A	27.2
2.5	2	28.1	A	27.7
3.5	2	28.1	A	27.8
22.5	2	28.1	A	28
24	2	28.1	A	28.2
25.5	2	28.1	A	28.5
27.5	2	28.1	A	28.5
29	2	28.1	A	28.2
71	2	28.1	A	28.2
72	2	28.1	A	28.5
0.5	2	28.1	B	27.2
1.5	2	28.1	B	27.5
2.5	2	28.1	B	27.7
3.5	2	28.1	B	27.7
22.5	2	28.1	B	28
24	2	28.1	B	28.2
25.5	2	28.1	B	28.5
27.5	2	28.1	B	28.2
29	2	28.1	B	28.5
71	2	28.1	B	28.2
72	2	28.1	B	28.5
0.5	2	28.1	C	27
1.5	2	28.1	C	27.2
2.5	2	28.1	C	27.8
3.5	2	28.1	C	27.8
22.5	2	28.1	C	28.3
24	2	28.1	C	28
25.5	2	28.1	C	28.5
27.5	2	28.1	C	28.2
29	2	28.1	C	28
71	2	28.1	C	28
72	2	28.1	C	28.5
0.5	2	28.6	A	28.2
1.5	2	28.6	A	28.8
2.5	2	28.6	A	28.5
3.5	2	28.6	A	28.9
22.5	2	28.6	A	28.8
24	2	28.6	A	29
25.5	2	28.6	A	28.8
27.5	2	28.6	A	28.8
29	2	28.6	A	29
71	2	28.6	A	29
72	2	28.6	A	28.8
0.5	2	28.6	B	28.2
1.5	2	28.6	B	28.7
2.5	2	28.6	B	28.9
3.5	2	28.6	B	28.8
22.5	2	28.6	B	28.9
24	2	28.6	B	29
25.5	2	28.6	B	29
27.5	2	28.6	B	29
29	2	28.6	B	29
71	2	28.6	B	29
72	2	28.6	B	29
0.5	2	28.6	C	28
1.5	2	28.6	C	28.5
2.5	2	28.6	C	28.5
3.5	2	28.6	C	28.8
22.5	2	28.6	C	28.5
24	2	28.6	C	28.5
25.5	2	28.6	C	28.8
27.5	2	28.6	C	29
29	2	28.6	C	28.8
71	2	28.6	C	29
72	2	28.6	C	29
0.5	2	28.6	A	30
1.5	2	28.1	A	30
2.5	2	29.9	A	30
3.5	2	29.9	A	29.9
22.5	2	29.9	A	30
24	2	29.9	A	30
25.5	2	29.9	A	30.2
27.5	2	29.9	A	30.2
29	2	29.9	A	30.2
71	2	29.9	A	30.2
72	2	29.9	A	30.2
0.5	2	29.9	B	29.8
1.5	2	29.9	B	29.9
2.5	2	29.9	B	29.9
3.5	2	29.9	B	29.9
22.5	2	29.9	B	30
24	2	29.9	B	30
25.5	2	29.9	B	30.2
27.5	2	29.9	B	30.2
29	2	29.9	B	30.2
71	2	29.9	B	30.2
72	2	29.9	B	30.5
0.5	2	29.9	C	29.2
1.5	2	29.9	C	29.9
2.5	2	29.9	C	29.9
3.5	2	29.9	C	29.9
22.5	2	29.9	C	29.9
24	2	29.9	C	30
25.5	2	29.9	C	30
27.5	2	29.9	C	30.2
29	2	29.9	C	30
71	2	29.9	C	30.2
72	2	29.9	C	30.2
1	3	28.1	A	27.8
2	3	28.1	A	27.9
3	3	28.1	A	28
4	3	28.1	A	28
22.5	3	28.1	A	28.8
23.5	3	28.1	A	28.8
26.5	3	28.1	A	29.1
46.5	3	28.1	A	28.7
47.5	3	28.1	A	28.9
48.5	3	28.1	A	28.9
70	3	28.1	A	28.8
71	3	28.1	A	29
1	3	28.1	B	27.8
2	3	28.1	B	28
3	3	28.1	B	28.4
4	3	28.1	B	28.1
22.5	3	28.1	B	28.8
23.5	3	28.1	B	28.6
26.5	3	28.1	B	29.1
46.5	3	28.1	B	28.8
47.5	3	28.1	B	28.9
48.5	3	28.1	B	28.9
70	3	28.1	B	29
71	3	28.1	B	29
1	3	28.1	C	27.6
2	3	28.1	C	27.8
3	3	28.1	C	27.9
4	3	28.1	C	28
22.5	3	28.1	C	28.8
23.5	3	28.1	C	28.8
26.5	3	28.1	C	29.1
46.5	3	28.1	C	28.7
47.5	3	28.1	C	28.7
48.5	3	28.1	C	28.7
70	3	28.1	C	28.8
71	3	28.1	C	29
1	3	28.6	A	28
2	3	28.6	A	28.4
3	3	28.6	A	28.7
4	3	28.6	A	28.6
22.5	3	28.6	A	29
23.5	3	28.6	A	28.8
26.5	3	28.6	A	29.1
46.5	3	28.6	A	28.9
47.5	3	28.6	A	28.9
48.5	3	28.6	A	28.9
70	3	28.6	A	28.9
71	3	28.6	A	29
1	3	28.6	B	28
2	3	28.6	B	28.8
3	3	28.6	B	28.7
4	3	28.6	B	28.8
22.5	3	28.6	B	29
23.5	3	28.6	B	28.8
26.5	3	28.6	B	29.1
46.5	3	28.6	B	28.9
47.5	3	28.6	B	28.9
48.5	3	28.6	B	28.9
70	3	28.6	B	29
71	3	28.6	B	29
1	3	28.6	C	28
2	3	28.6	C	28.4
3	3	28.6	C	28.7
4	3	28.6	C	28.7
22.5	3	28.6	C	29
23.5	3	28.6	C	28.9
26.5	3	28.6	C	29.1
46.5	3	28.6	C	29
47.5	3	28.6	C	29
48.5	3	28.6	C	29
70	3	28.6	C	29
71	3	28.6	C	29.2
1	3	29.9	A	29
2	3	29.9	A	29.6
3	3	29.9	A	29.4
4	3	29.9	A	29.5
22.5	3	29.9	A	29.9
23.5	3	29.9	A	29.9
26.5	3	29.9	A	30
46.5	3	29.9	A	30
47.5	3	29.9	A	30
48.5	3	29.9	A	30
70	3	29.9	A	30.1
71	3	29.9	A	30.1
1	3	29.9	B	29
2	3	29.9	B	29.2
3	3	29.9	B	29.3
4	3	29.9	B	29.4
22.5	3	29.9	B	30
23.5	3	29.9	B	29.9
26.5	3	29.9	B	30
46.5	3	29.9	B	30
47.5	3	29.9	B	30
48.5	3	29.9	B	30
70	3	29.9	B	30.1
71	3	29.9	B	30
1	3	29.9	C	28.9
2	3	29.9	C	29
3	3	29.9	C	29.2
4	3	29.9	C	29.4
22.5	3	29.9	C	29.9
23.5	3	29.9	C	30
26.5	3	29.9	C	30
46.5	3	29.9	C	30
47.5	3	29.9	C	30
48.5	3	29.9	C	30
70	3	29.9	C	30.1
71	3	29.9	C	30.1

## Sheet: Host vs. symbiont NOS
Date	Trial	Hr	Treatment	Sample type	pmol/ml skeleton/min
2006-09-16	1	24	28.1	Symbiont	9.73437
2006-09-16	1	24	28.6	Symbiont	11.5422
2006-09-16	1	24	29.9	Symbiont	11.7252
2006-09-18	1	72	28.1	Symbiont	1.35576e-05
2006-09-18	1	72	28.6	Symbiont	60.9672
2006-09-18	1	72	29.9	Symbiont	28.9619
2006-10-13	2	72	28.1	Symbiont	23.8256
2006-10-13	2	72	28.6	Symbiont	98.7899
2006-10-13	2	72	29.9	Symbiont	347.78
2006-11-11	3	24	28.1	Symbiont	2.05641
2006-11-11	3	24	28.6	Symbiont	13.0254
2006-11-11	3	24	29.9	Symbiont	11.9832
11/13/206	3	72	28.1	Symbiont	4.98123
2006-11-13	3	72	28.6	Symbiont	42.5357
2006-11-13	3	72	29.9	Symbiont	53.5527
2006-12-11	4	24	28.1	Host	0.000712068
2006-12-11	4	24	28.6	Host	0.000233972
2006-12-11	4	24	29.9	Host	0.000696935
2006-12-13	4	72	28.1	Host	0.000233972
2006-12-13	4	72	28.6	Host	0.000601246
2006-12-13	4	72	29.9	Host	0.000233972
